# Supplementary material for: Enhanced Methyl Tert-Butyl Ether Removal by Mixed Consortium: Performance and Adaptability
Source: MDPI journal article supplement (doi:10.3390/app13042144), 2023-02-07
Supplement: s1 [file s1]

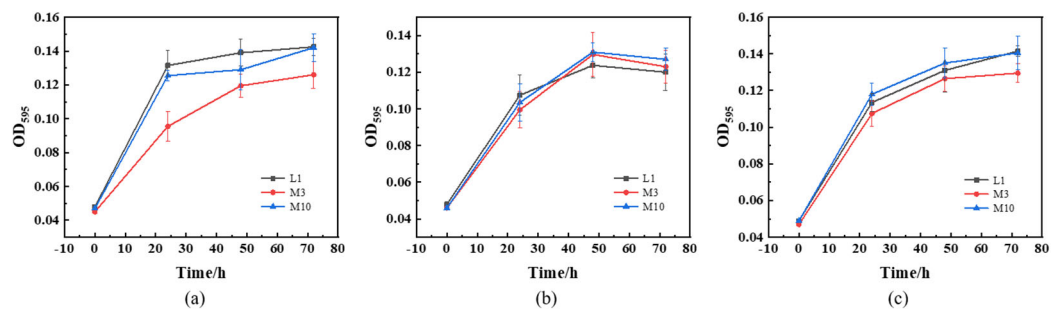

**Supplemental Figure S1.** Time course for strains growth with the addition of (a) dodecane, (b) benzene and (c) toluene.
